# Supplementary material for: Chemoenzymatic Protocol for the Synthesis of Enantiopure β-Blocker (S)-Bisoprolol
Source: MDPI journal article supplement (doi:10.3390/catal13010054), 2022-12-27
Supplement: s1 [file s1]

## Supplementary Materials

Spectroscopic and chromatographic data

# Chemo-enzymatic Protocol for the Synthesis of Enantiopure $\beta$ -Blocker (S)-Bisoprolol

Lucas Bocquin and Elisabeth Egholm Jacobsen \*

Department of Chemistry, Norwegian University of Science and Technology  
Høgskoleringen 5, 7491 Trondheim

\* Correspondence: elisabeth.e.jacobsen@ntnu.no

## 1. NMR-Spectra

### 4-((2-Isopropoxyethoxy)methyl)phenol (2)

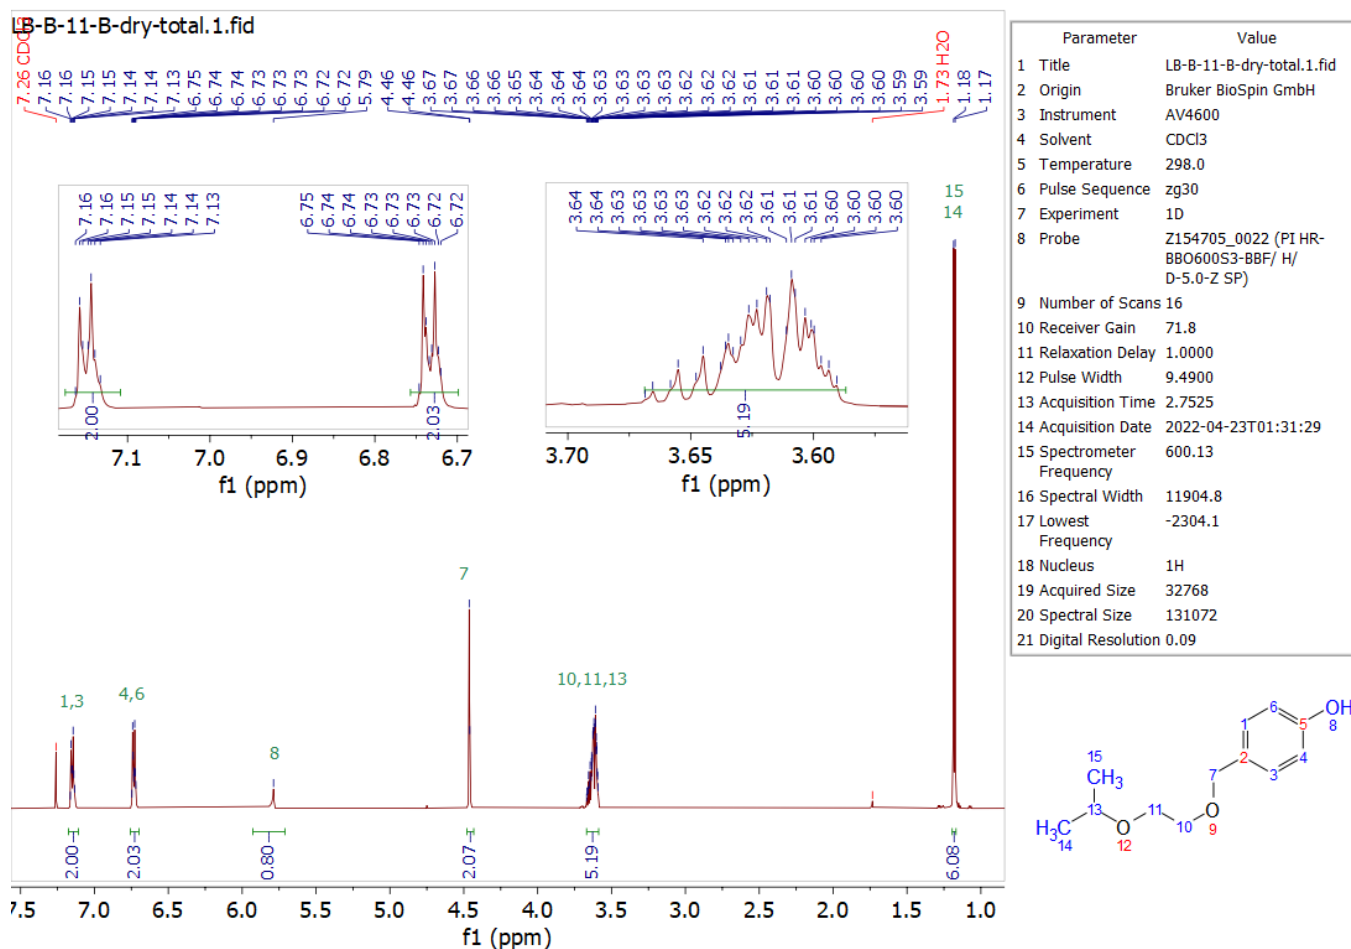

Figure S1. <sup>1</sup>H-NMR spectrum (600 MHz, CDCl<sub>3</sub>) of 4-((2-isopropoxyethoxy)methyl)phenol (2).

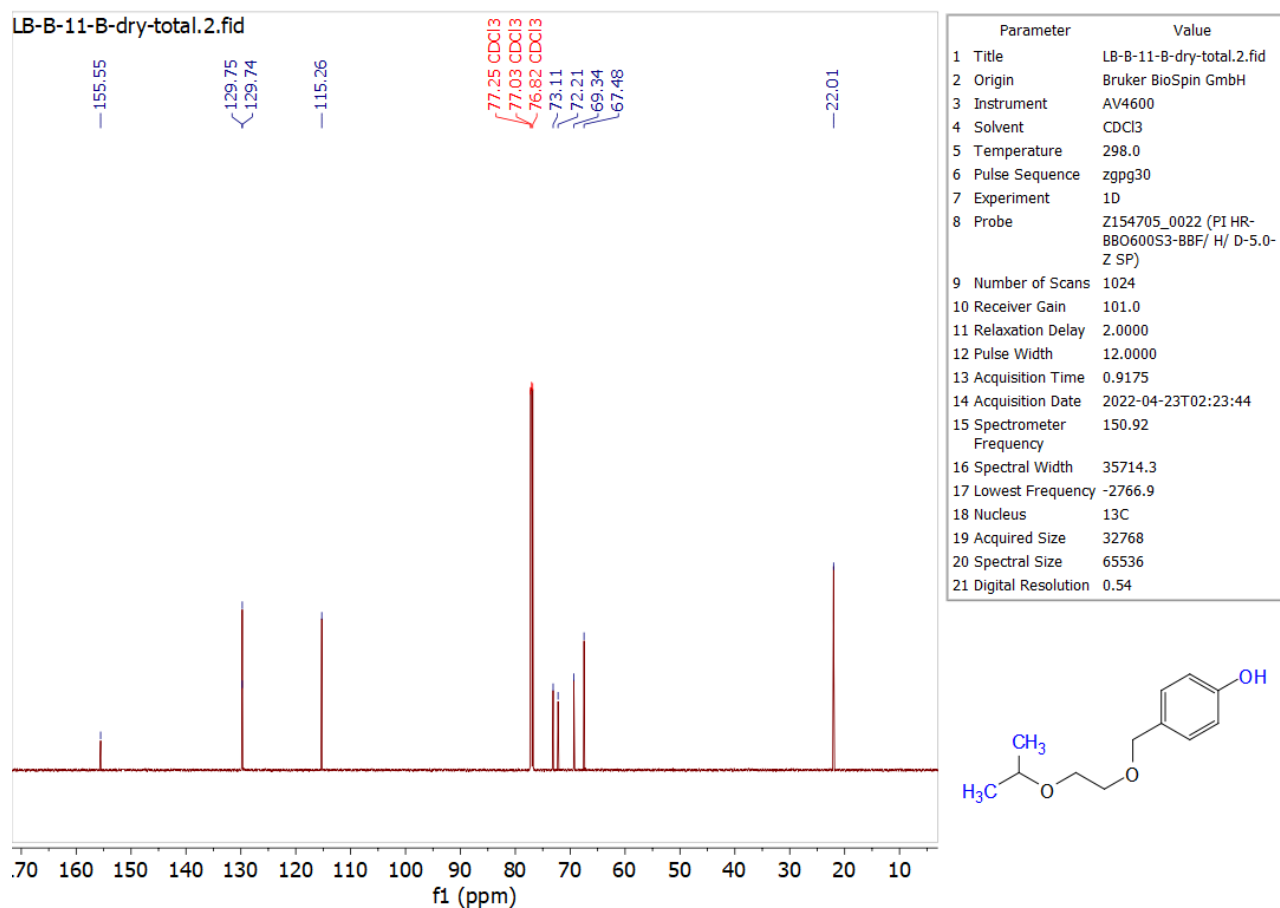

**Figure S2.**  $^{13}\text{C}$ -NMR spectrum (151 MHz,  $\text{CDCl}_3$ ) of 4-((2-isopropoxyethoxy)methyl)phenol (**2**).

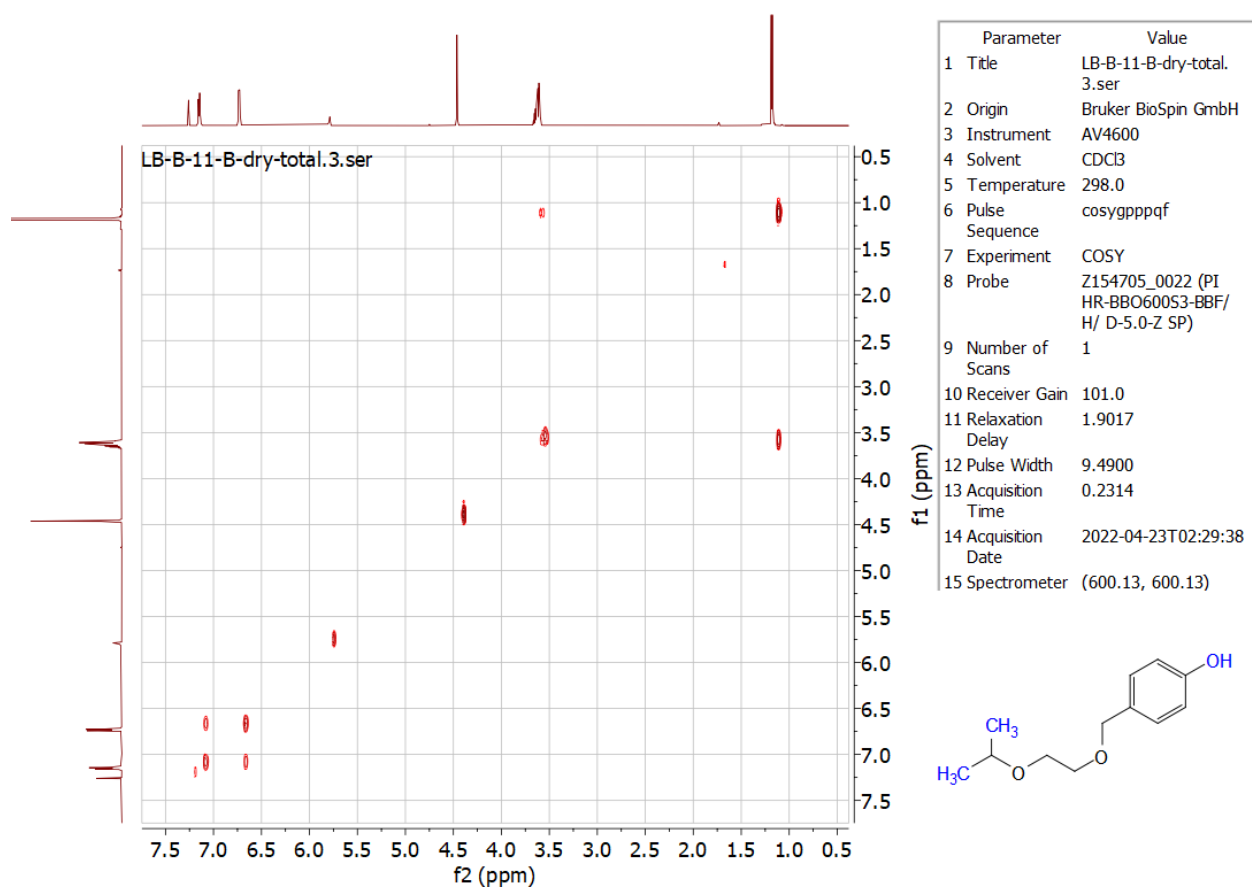

**Figure S3.** H,H-COSY-NMR spectrum (600 MHz, CDCl<sub>3</sub>) of 4-((2-isopropoxyethoxy)methyl)phenol (**2**).

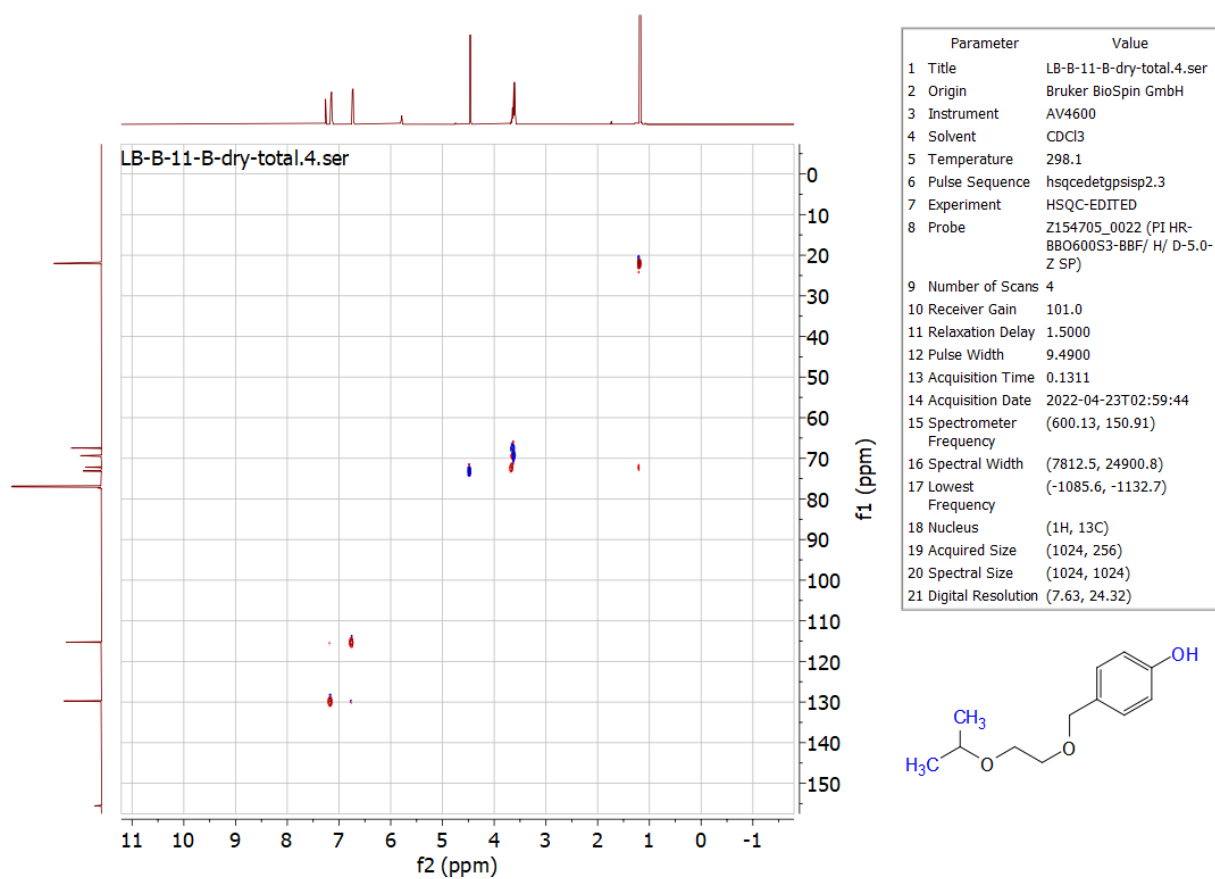

**Figure S4.** HSQC-NMR spectrum (600 MHz, CDCl<sub>3</sub>) of 4-((2-isopropoxyethoxy)methyl)phenol (2).

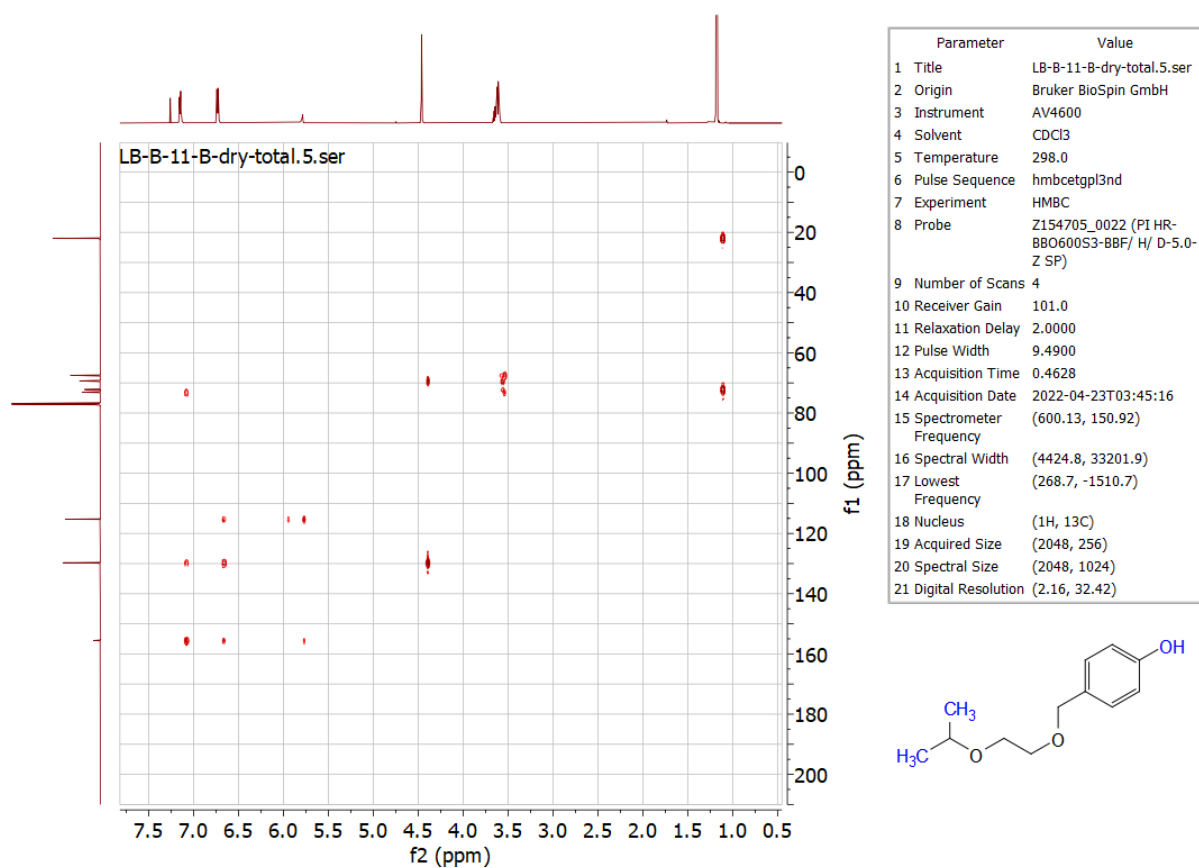

**Figure S5.** HMBC-NMR spectrum (600 MHz, CDCl<sub>3</sub>) of 4-((2-isopropoxyethoxy)methyl)phenol (2).

# 1-Chloro-3-(4-((2-isopropoxyethoxy)methyl)phenoxy)propan-2-ol (4)

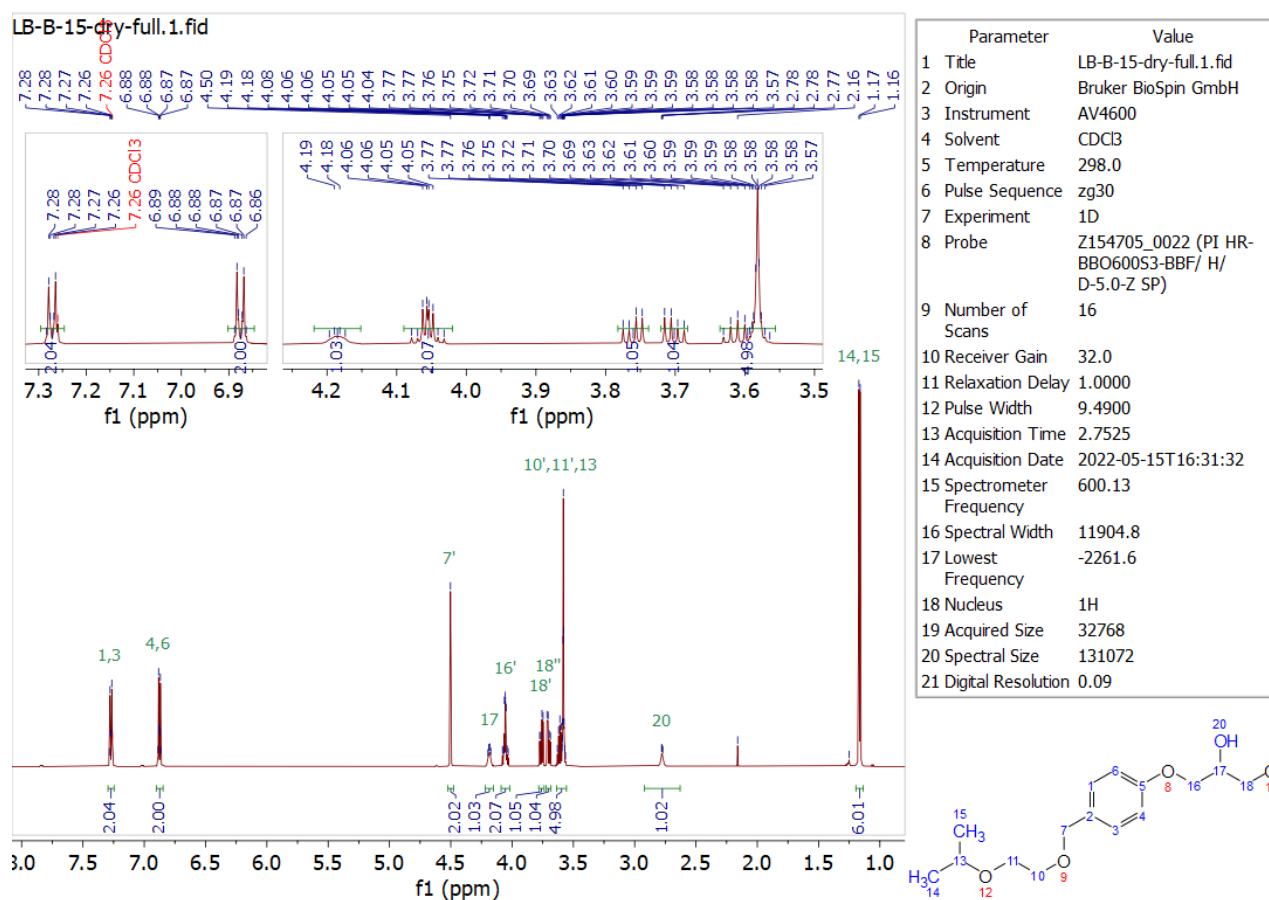

**Figure S6.** <sup>1</sup>H-NMR spectrum (600 MHz, CDCl<sub>3</sub>) of 1-chloro-3-(4-((2-isopropoxyethoxy)methyl)phenoxy)propan-2-ol (4).

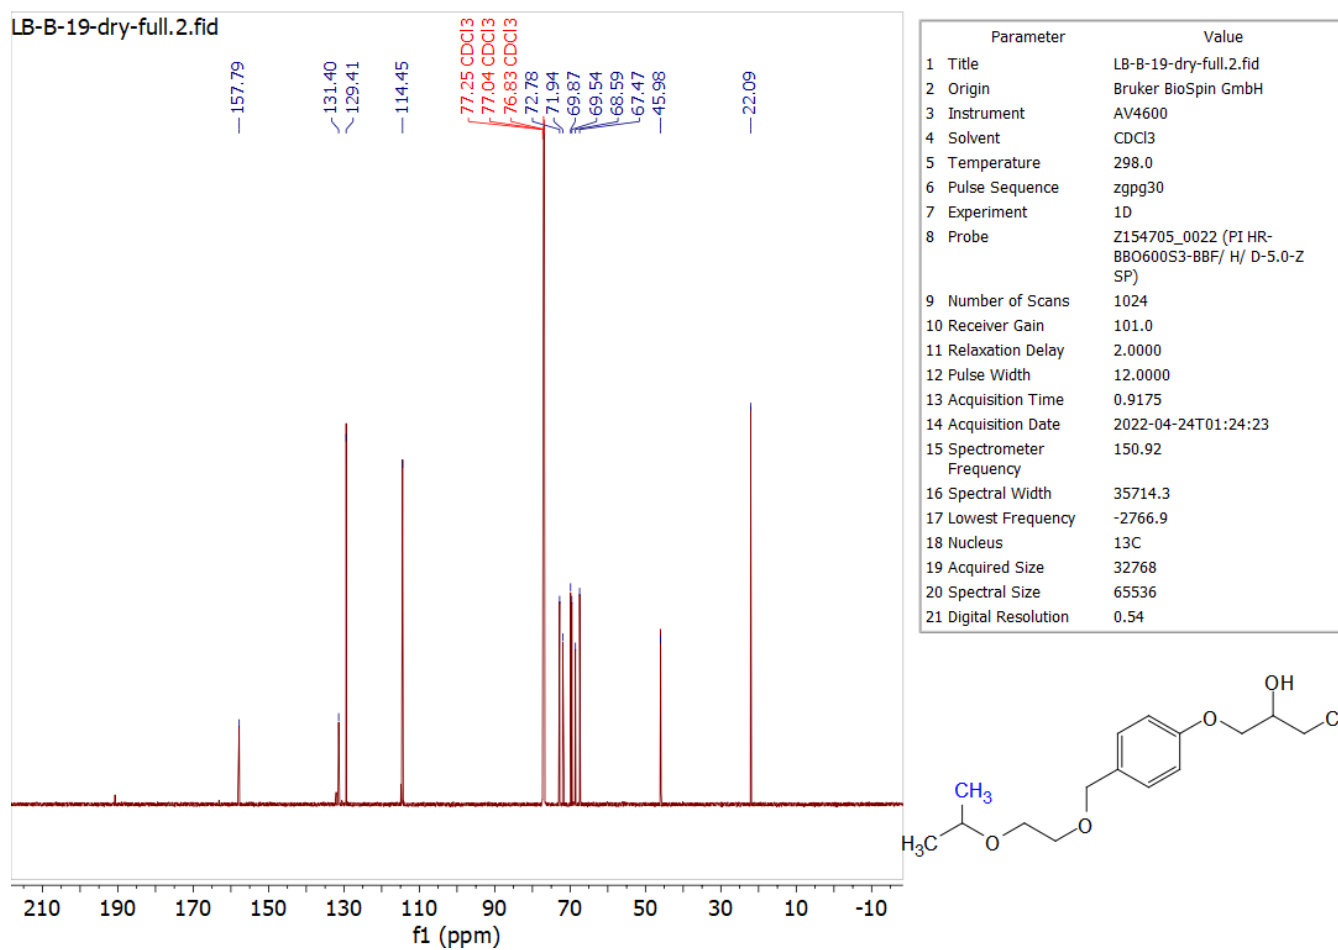

**Figure S7.**  $^{13}\text{C}$ -NMR spectrum (151 MHz,  $\text{CDCl}_3$ ) of 1-chloro-3-(4-((2-isopropoxyethoxy)methyl)phenoxy)propan-2-ol (**4**).

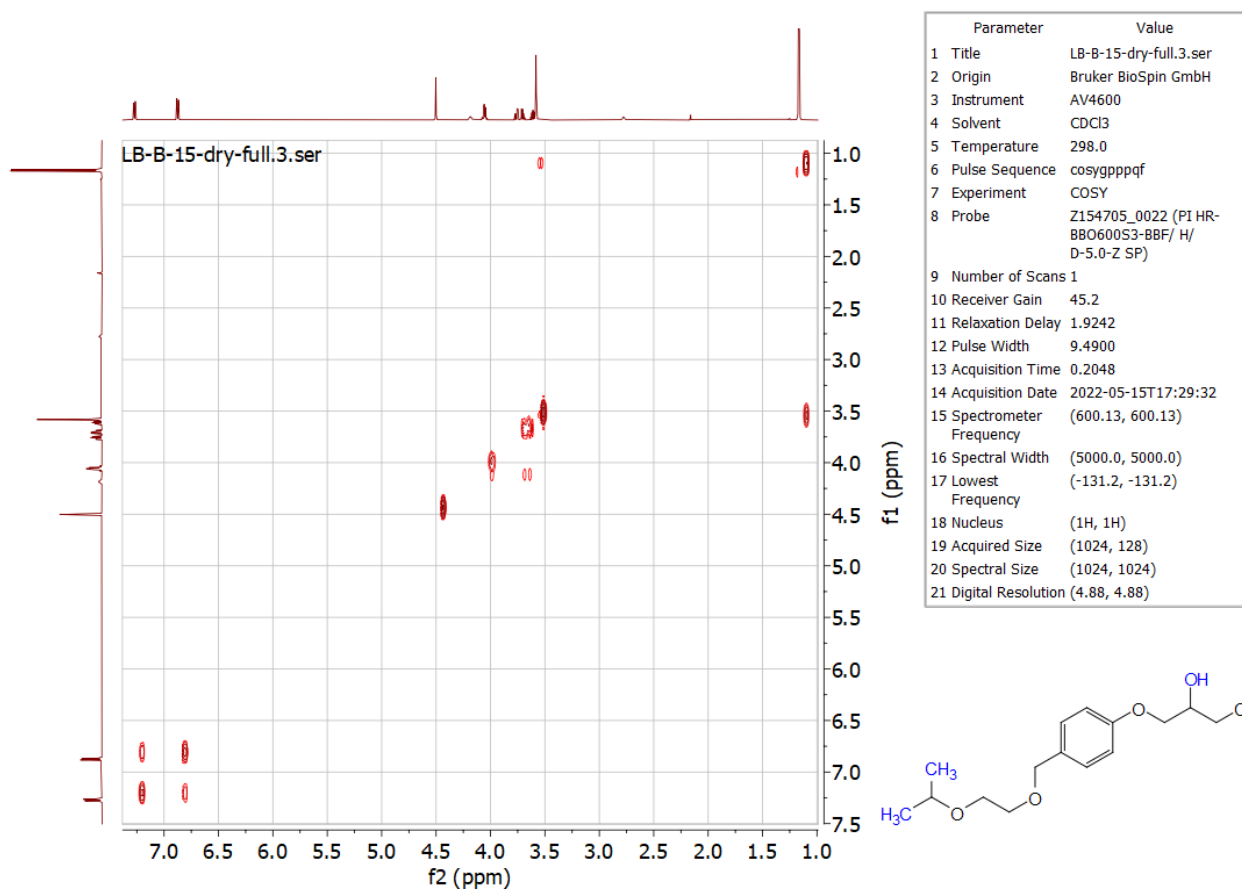

**Figure S8.** H,H-COSY-NMR spectrum (600 MHz, CDCl<sub>3</sub>) of 1-chloro-3-(4-((2-isopropoxyethoxy)methyl)phenoxy)propan-2-ol (**4**).



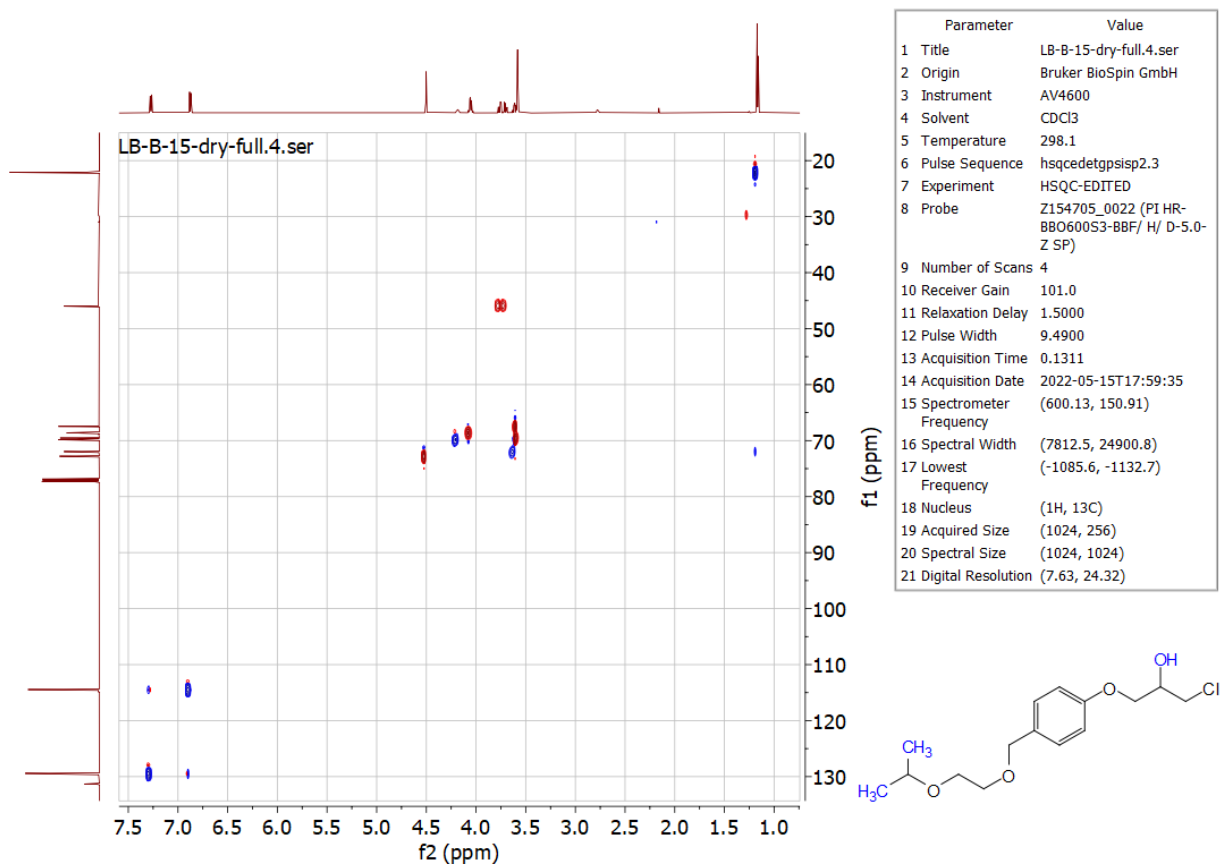

**Figure S9.** HSQC-NMR spectrum (600 MHz, CDCl<sub>3</sub>) of 1-chloro-3-(4-((2-isopropoxyethoxy)methyl)phenoxy)propan-2-ol (**4**).

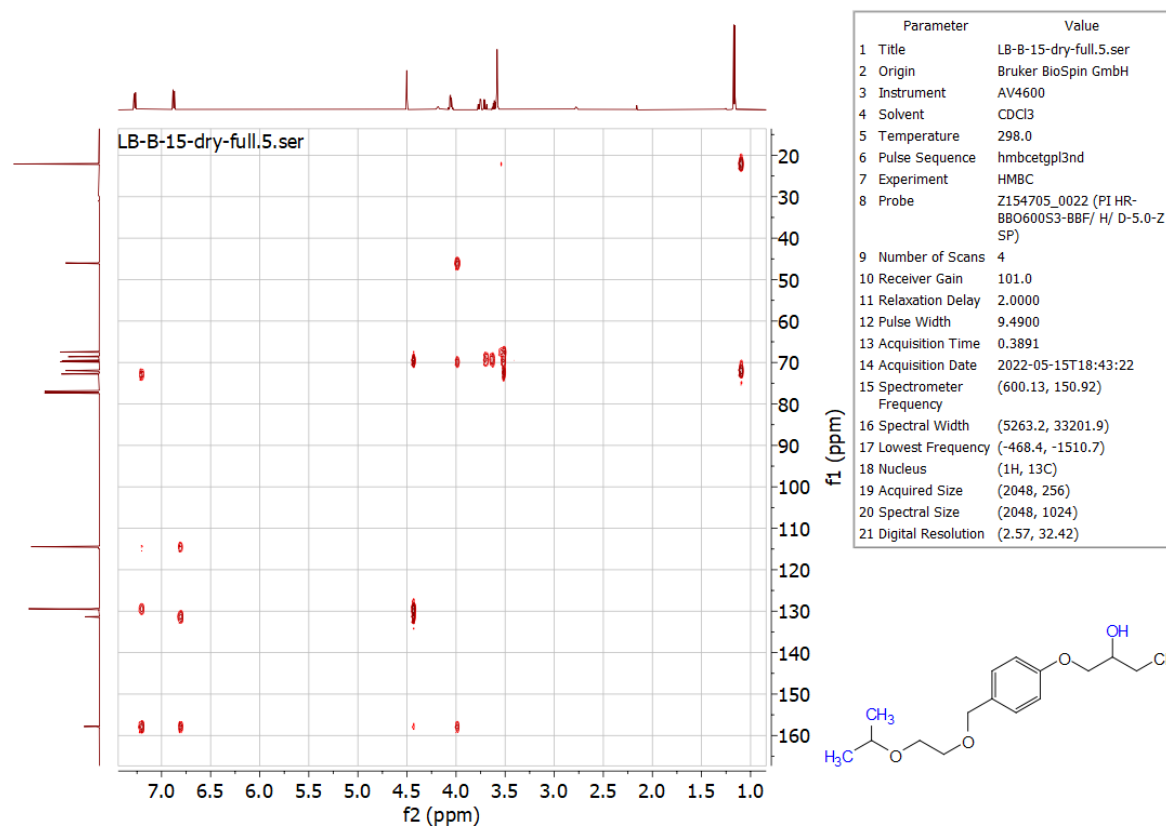

**Figure S10.** HMBC-NMR spectrum (600 MHz, CDCl<sub>3</sub>) of 1-chloro-3-(4-((2-isopropoxyethoxy)methyl)phenoxy)propan-2-ol (**4**).

**1-Chloro-3-(4-((2-isopropoxyethoxy)methyl)phenoxy)propan-2-yl butanoate**  
**(5)**

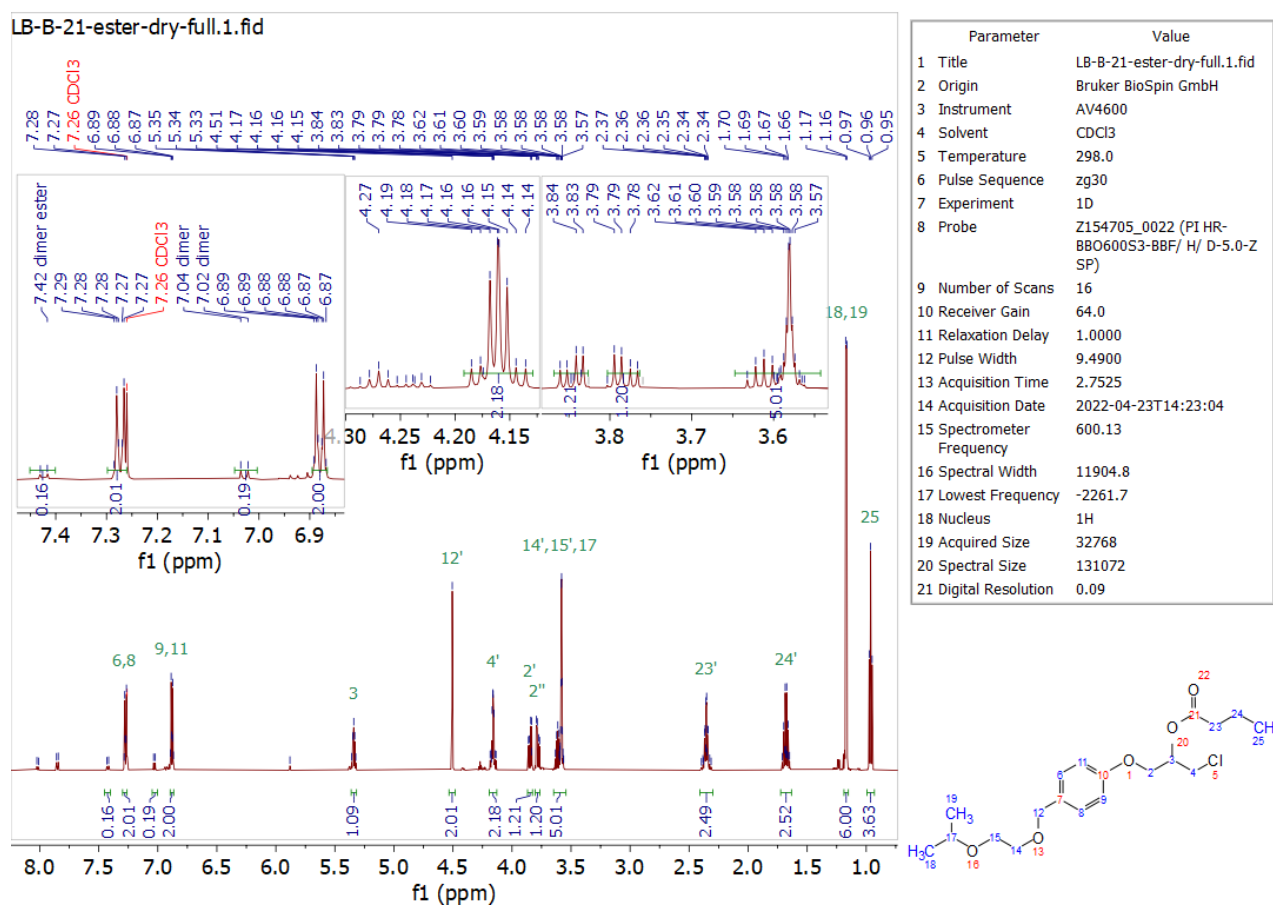

**Figure S11.** <sup>1</sup>H-NMR spectrum (600 MHz, CDCl<sub>3</sub>) of 1-chloro-3-(4-((2-isopropoxyethoxy)methyl)phenoxy)propan-2-yl butanoate (5).

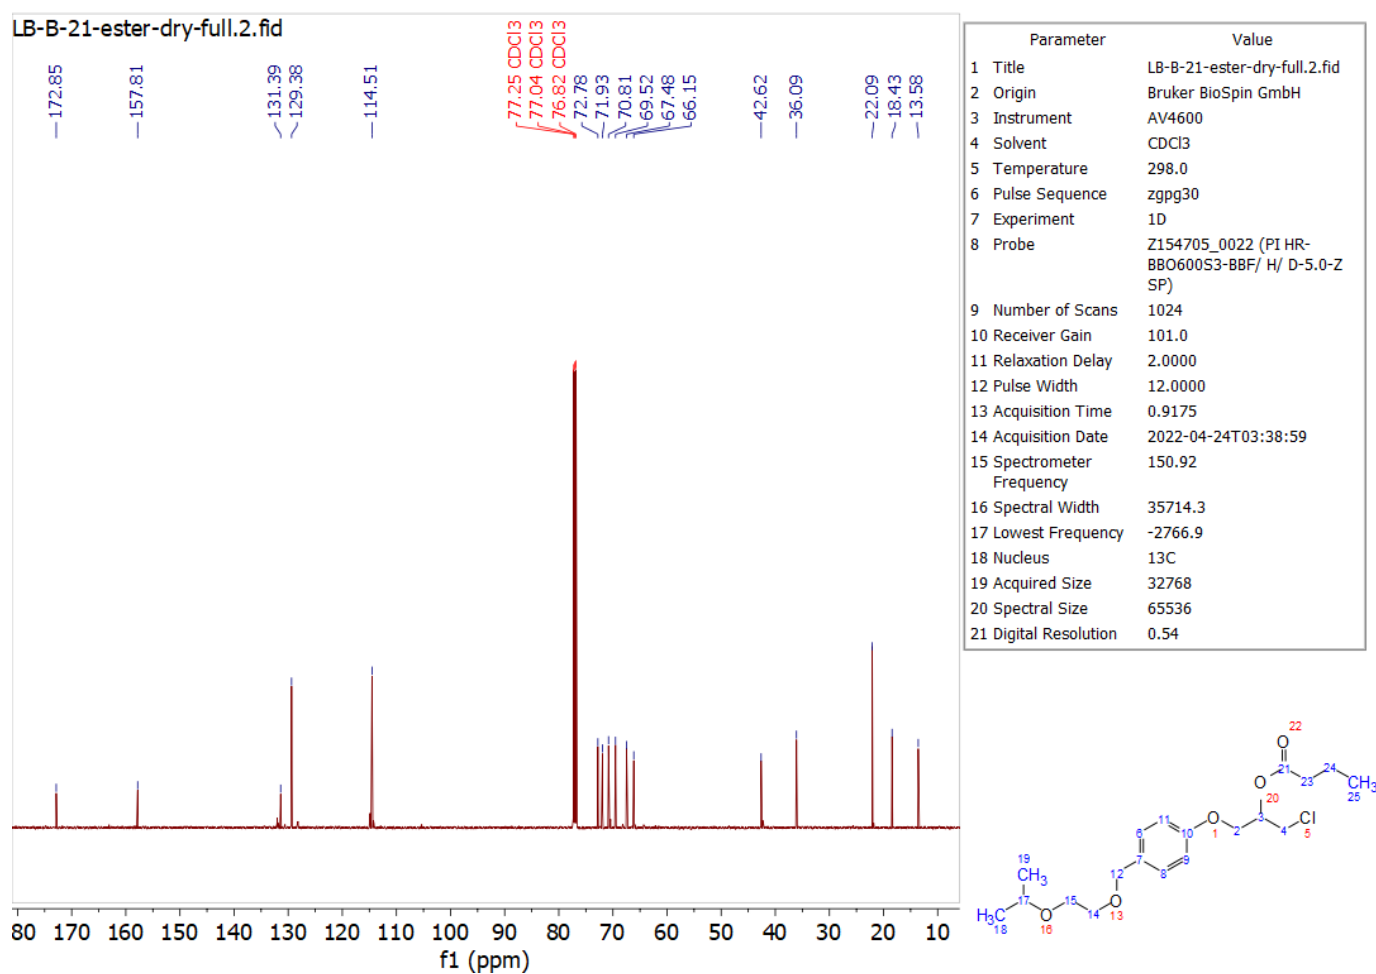

**Figure S12.**  $^{13}\text{C}$ -NMR spectrum (151 MHz,  $\text{CDCl}_3$ ) of 1-chloro-3-(4-((2-isopropoxyethoxy)methyl)phenoxy)propan-2-yl butanoate (**5**).

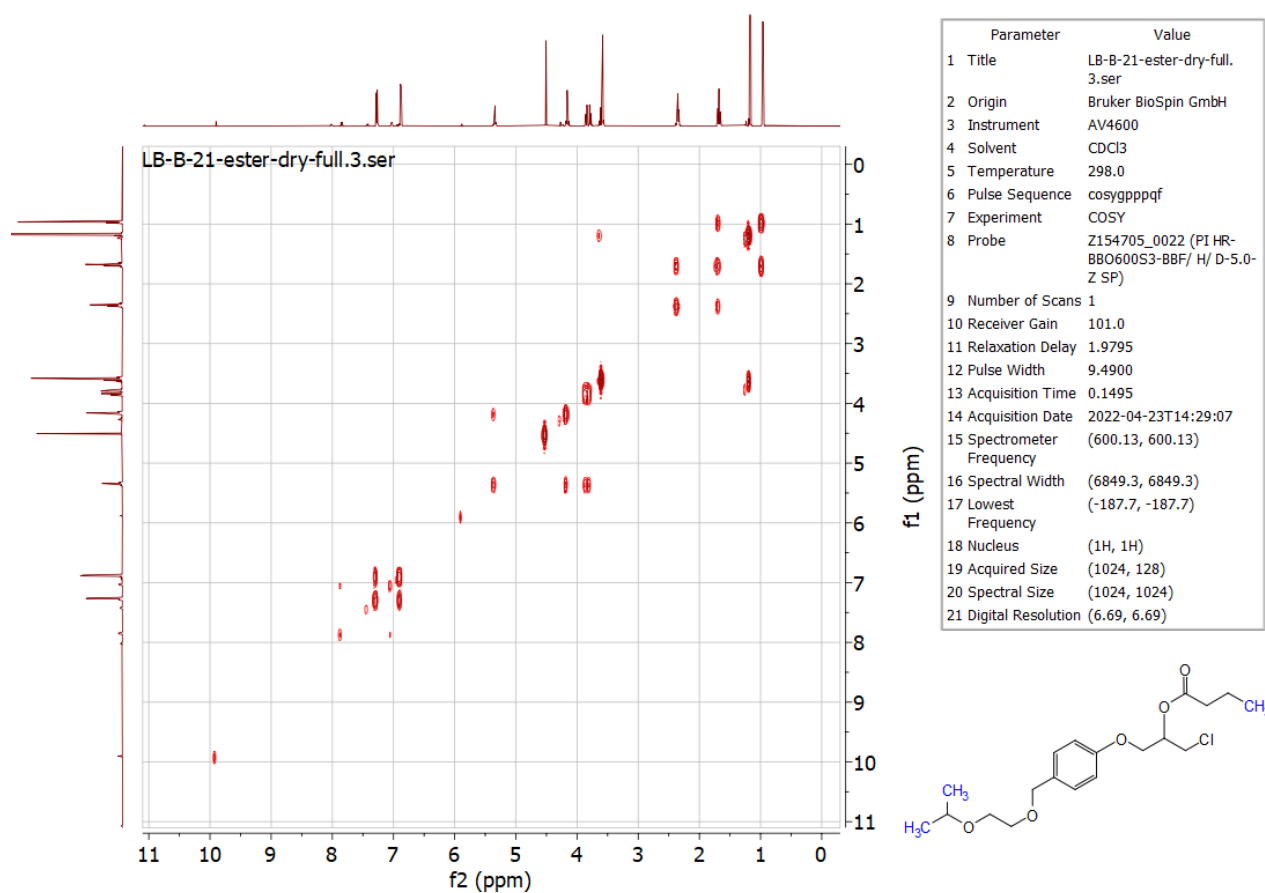

**Figure S13.** H,H-COSY-NMR spectrum (600 MHz, CDCl<sub>3</sub>) of 1-chloro-3-(4-((2-isopropoxyethoxy)methyl)phenoxy)propan-2-yl butyrate (**5**).

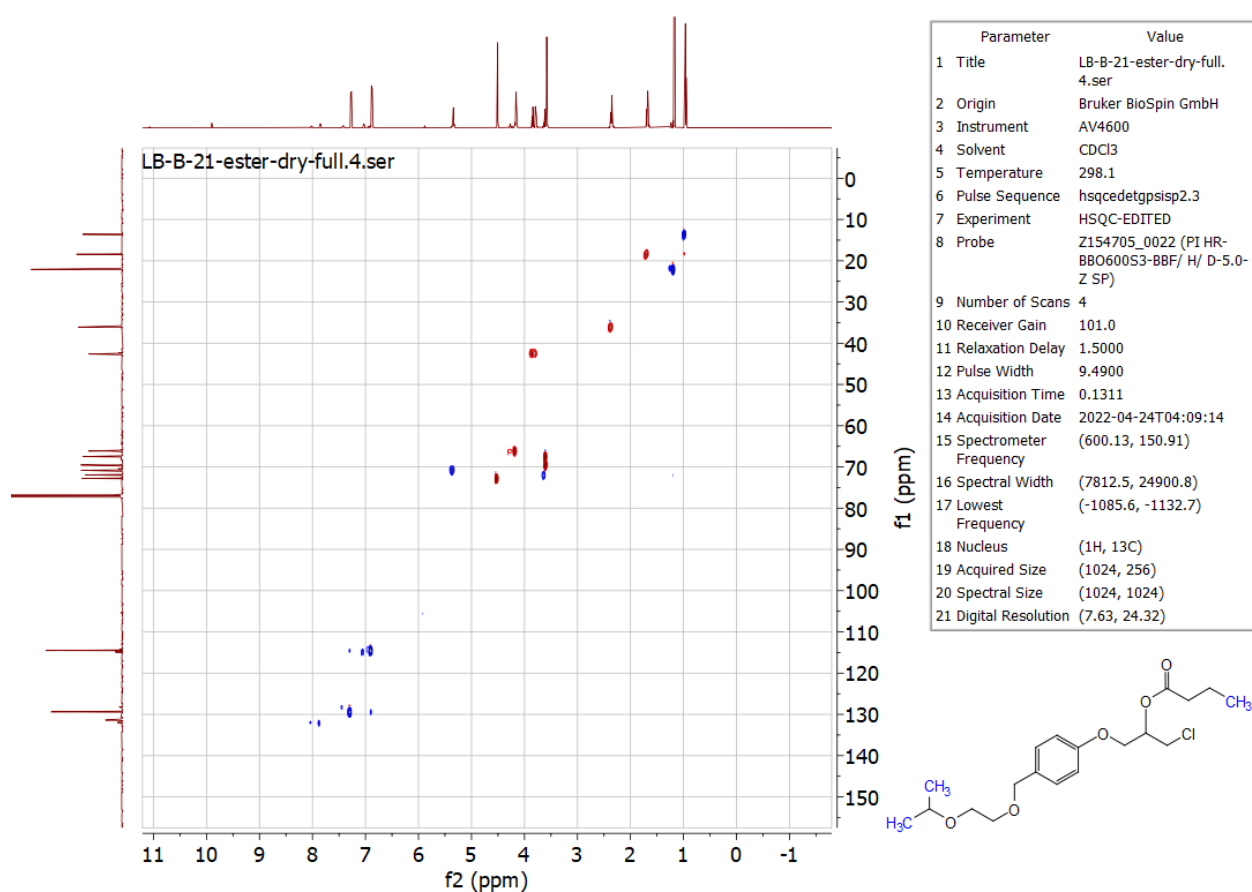

**Figure S14.** HSQC-NMR spectrum (600 MHz, CDCl<sub>3</sub>) of 1-chloro-3-(4-((2-isopropoxyethoxy)methyl)phenoxy)propan-2-yl butyrate (**5**).

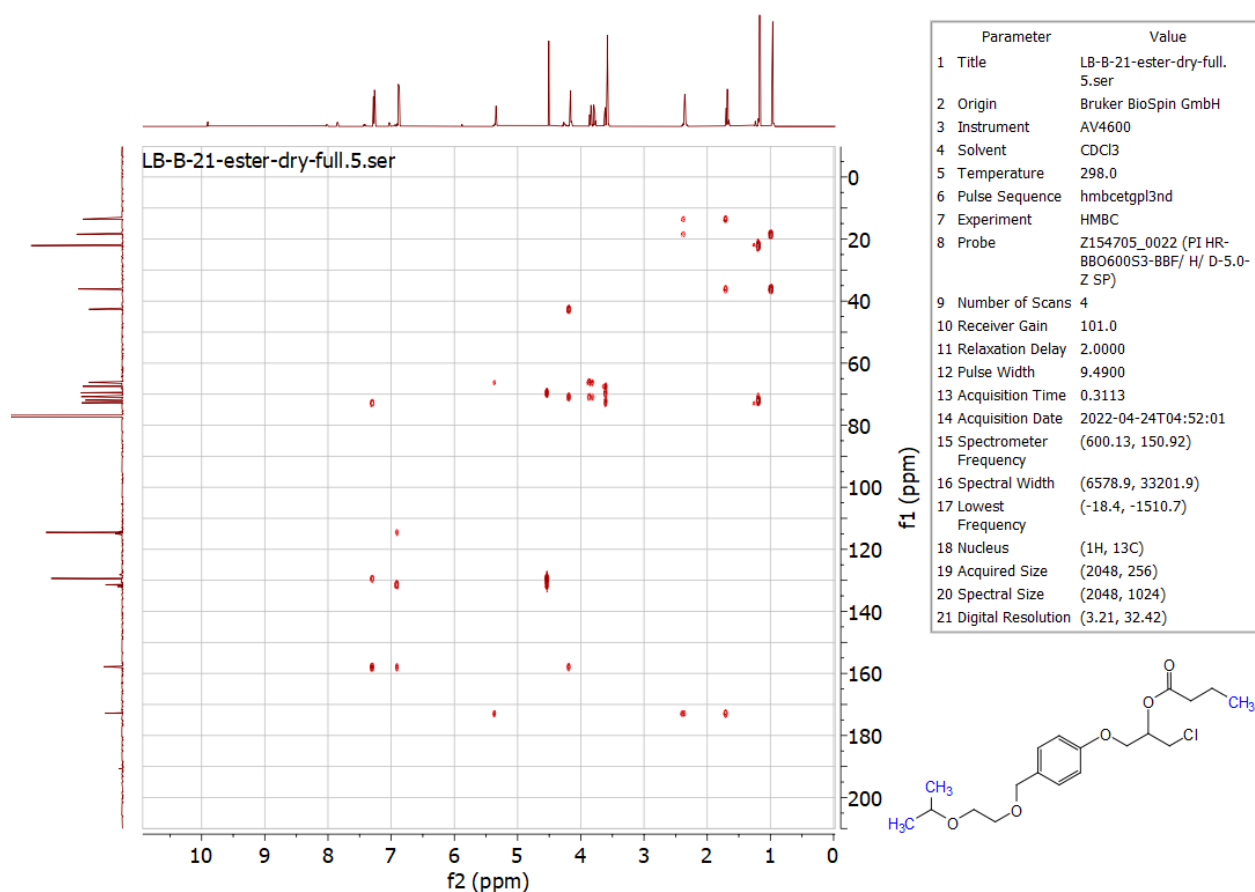

**Figure S15.** HMBC-NMR spectrum (600 MHz, CDCl<sub>3</sub>) of 1-chloro-3-(4-((2-isopropoxyethoxy)methyl)phenoxy)propan-2-yl butyrate (**5**).

## Bisoprolol (6)

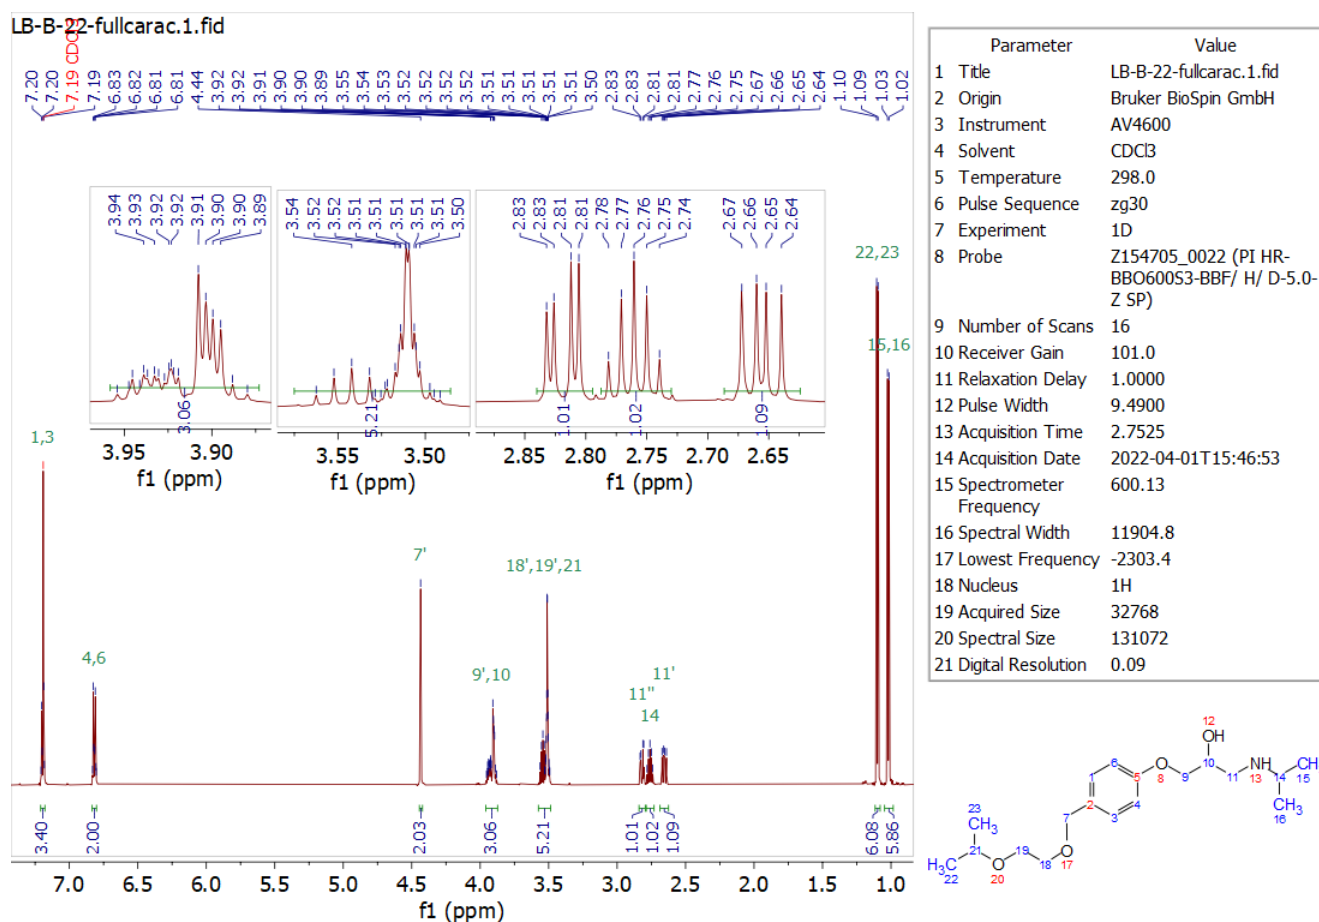

**Figure S16.** <sup>1</sup>H-NMR spectrum (600 MHz, CDCl<sub>3</sub>) of bisoprolol (6).



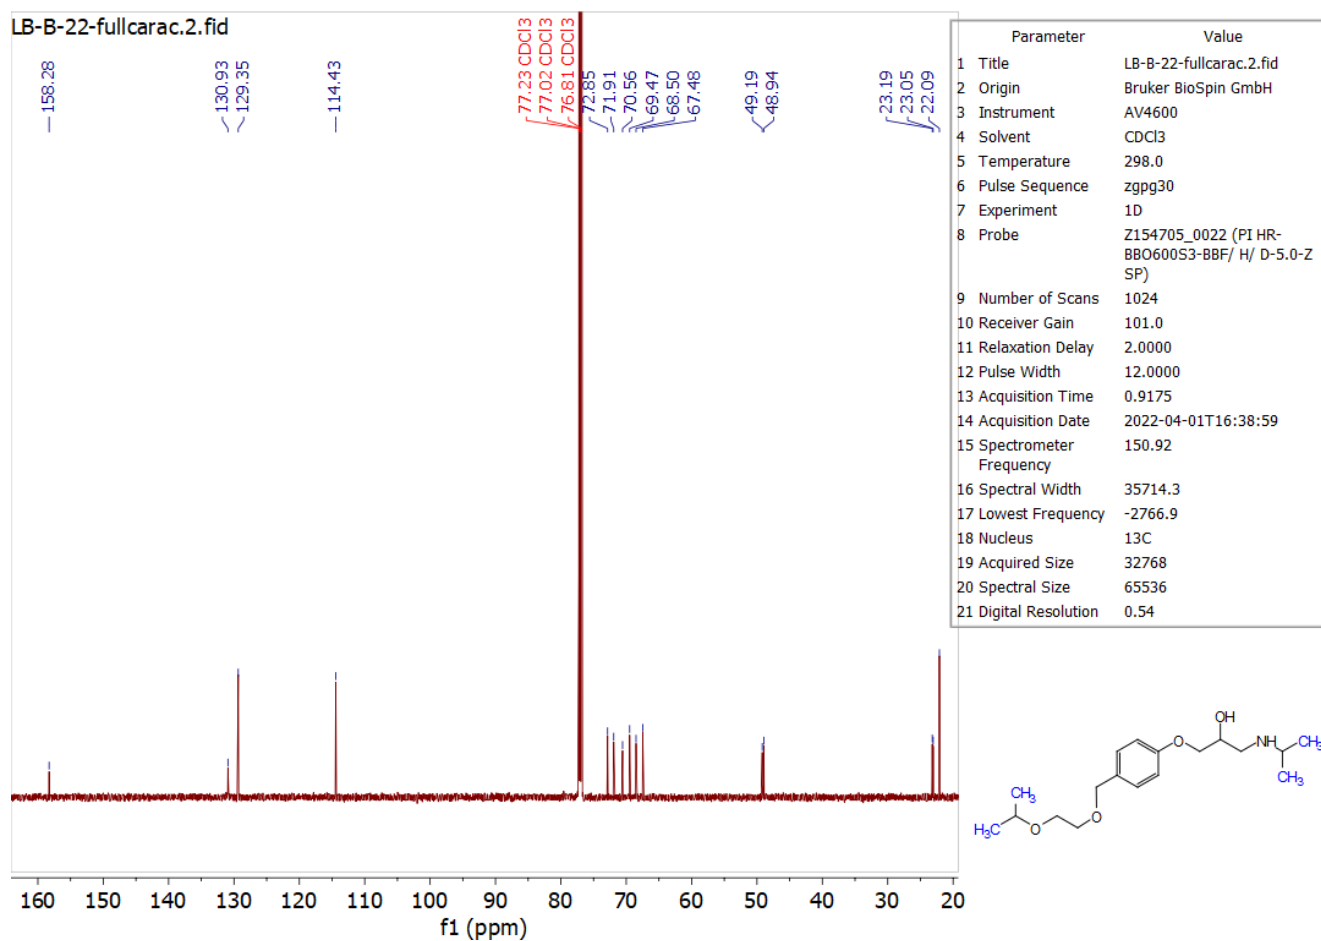

**Figure S17.**  $^{13}\text{C}$ -NMR spectrum (151 MHz,  $\text{CDCl}_3$ ) of bisoprolol (**6**).

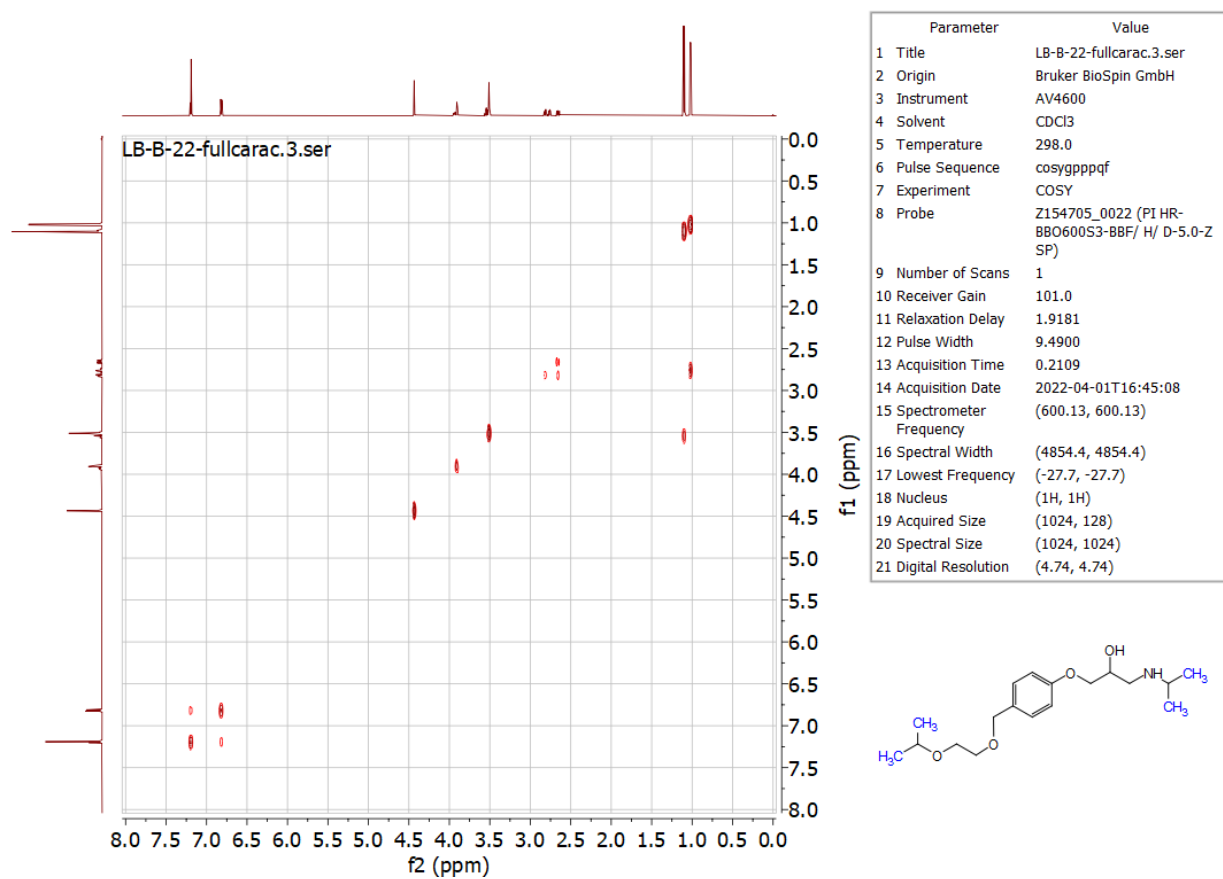

**Figure S18.** H,H-COSY-NMR spectrum (600 MHz, CDCl<sub>3</sub>) of bisoprolol (6).

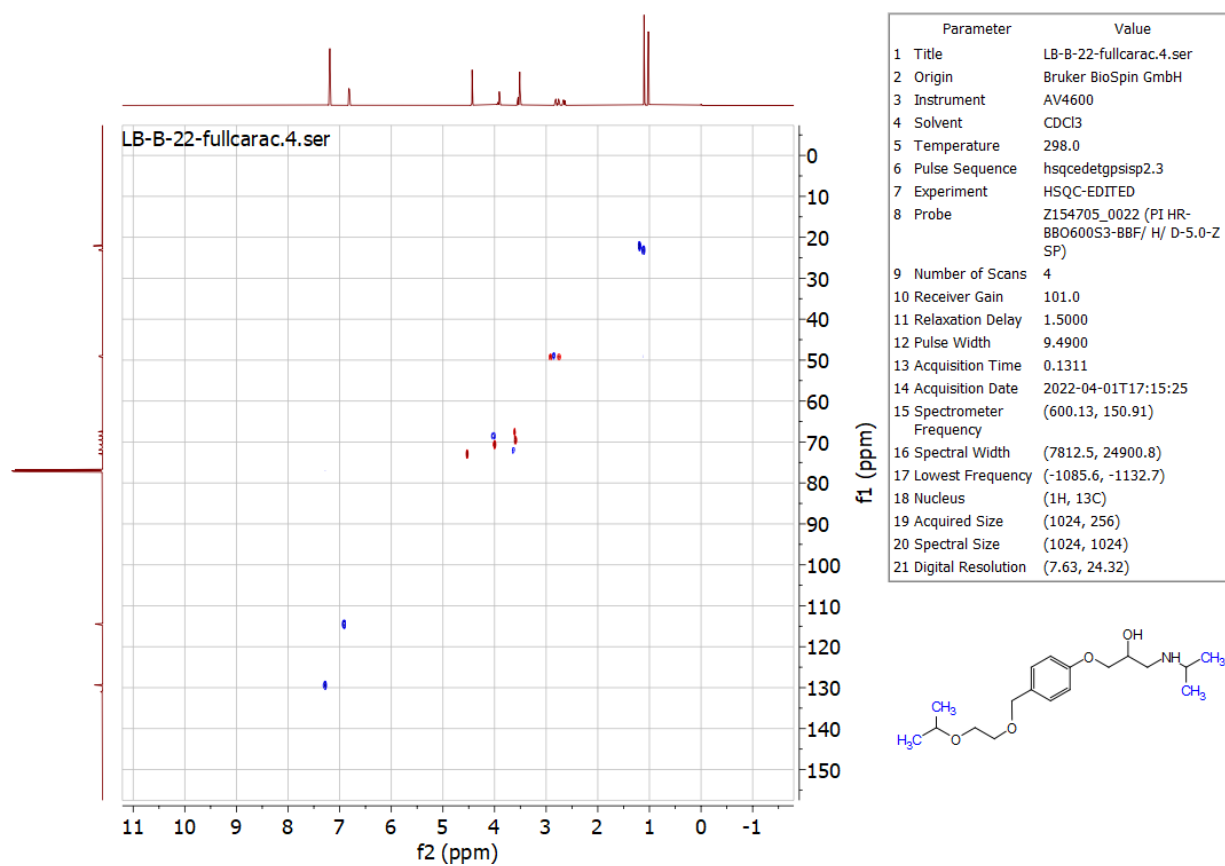

**Figure S19.** HSQC-NMR spectrum (600 MHz, CDCl<sub>3</sub>) of bisoprolol (**6**).

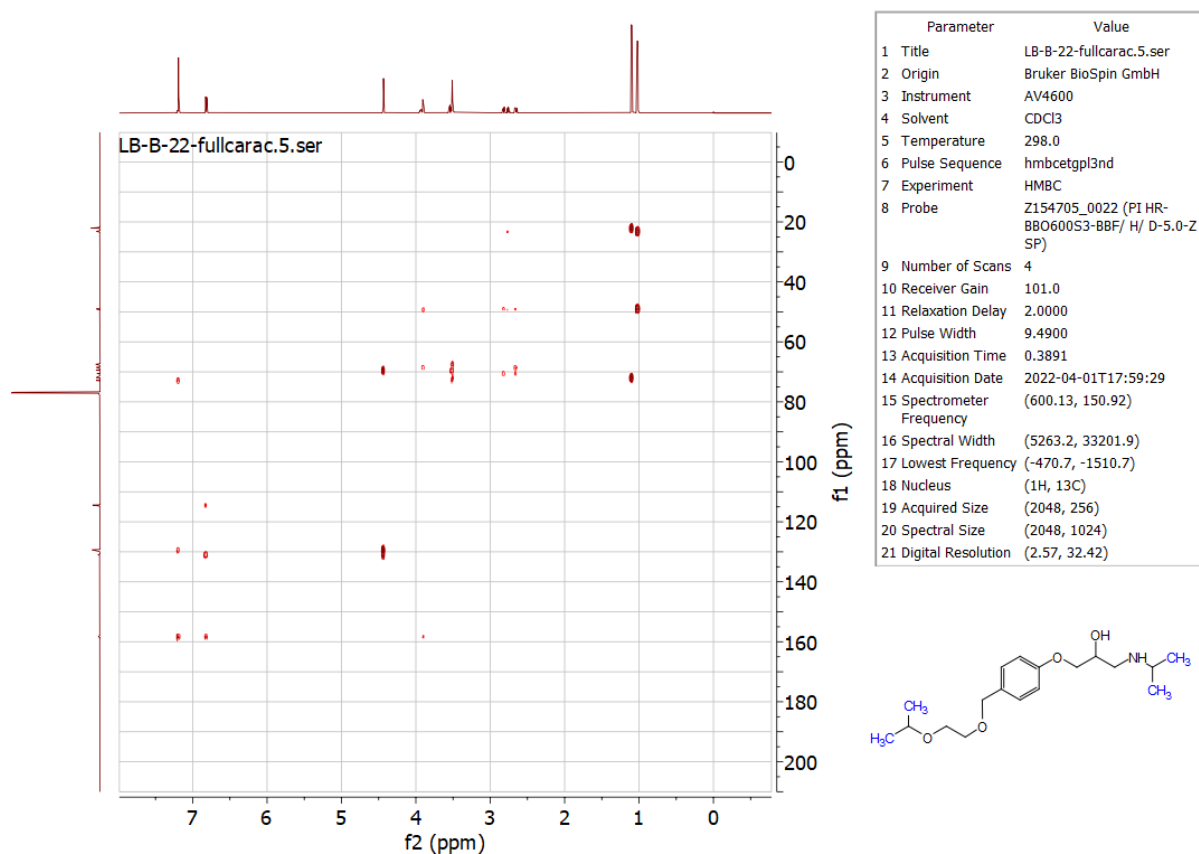

**Figure S20.** HMBC-NMR spectrum (600 MHz, CDCl<sub>3</sub>) of bisoprolol (**6**).

## Bisoprolol hemifumarate (7)

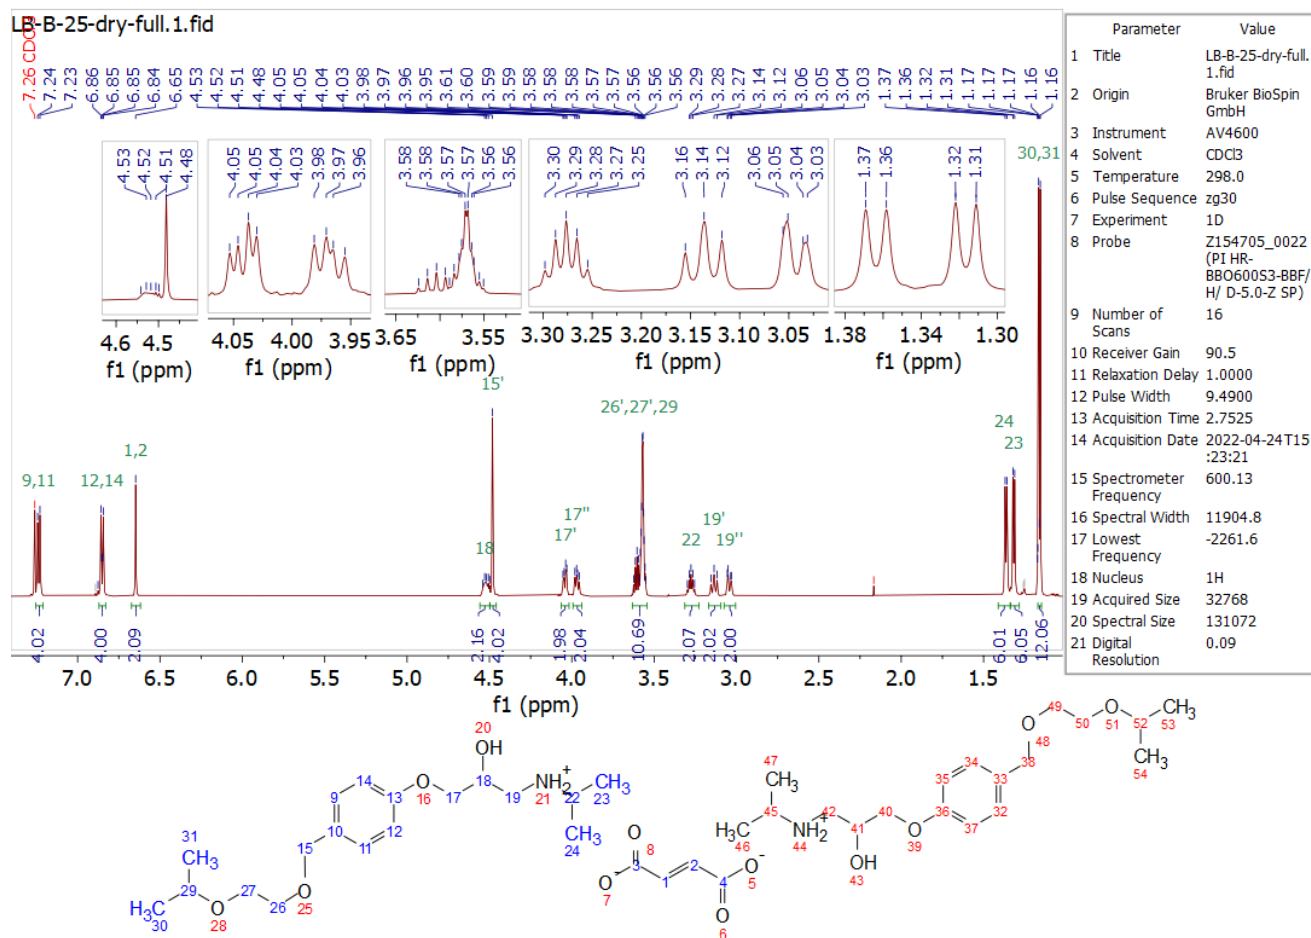

**Figure S21.** <sup>1</sup>H-NMR spectrum (600 MHz, CDCl<sub>3</sub>) of bisoprolol hemifumarate (7).

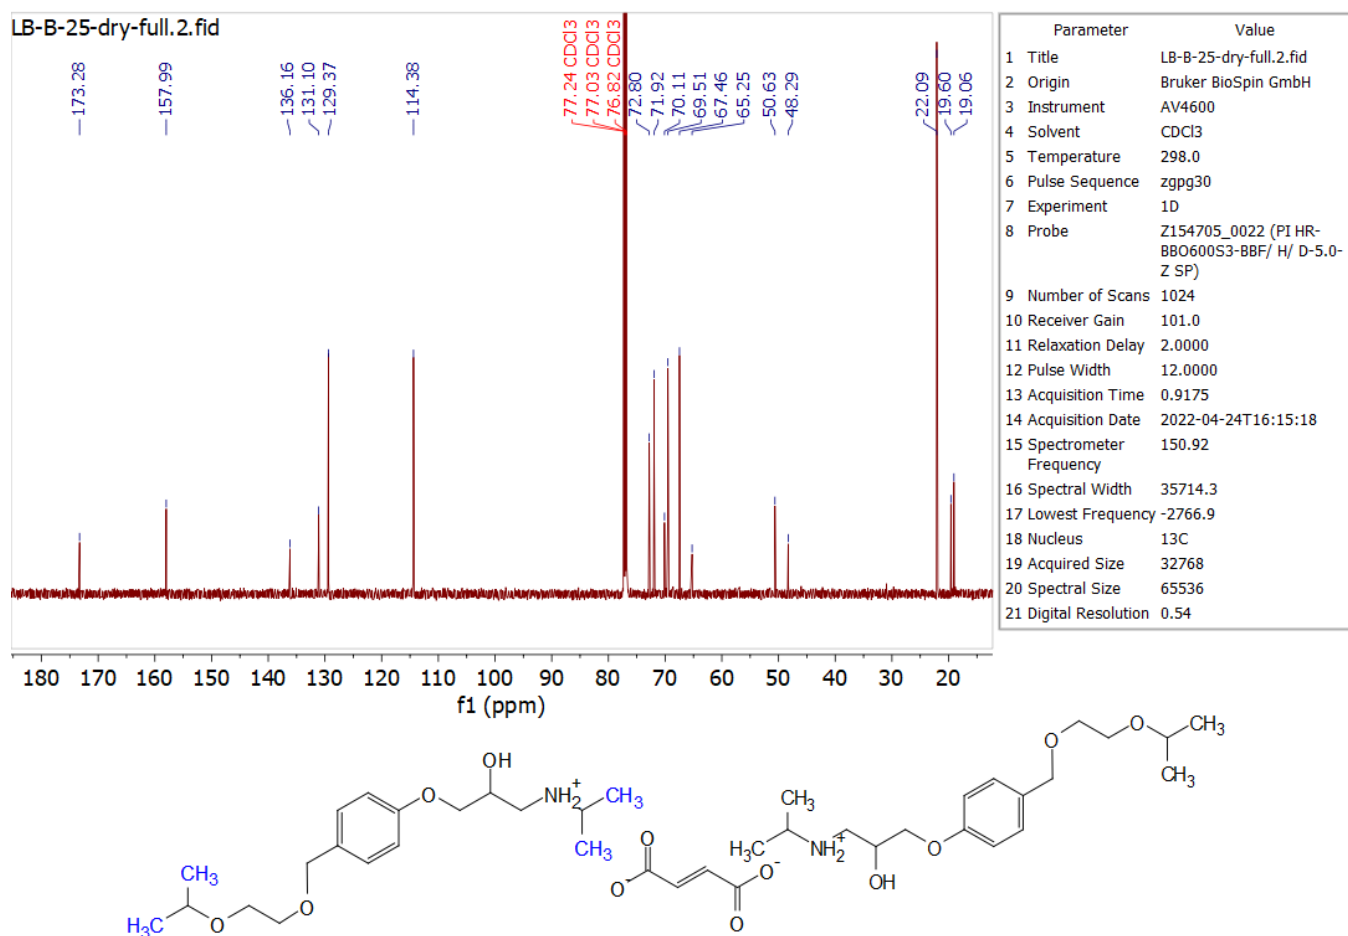

**Figure S22.**  $^{13}\text{C}$ -NMR spectrum (151 MHz,  $\text{CDCl}_3$ ) of bisoprolol hemifumarate (**7**).

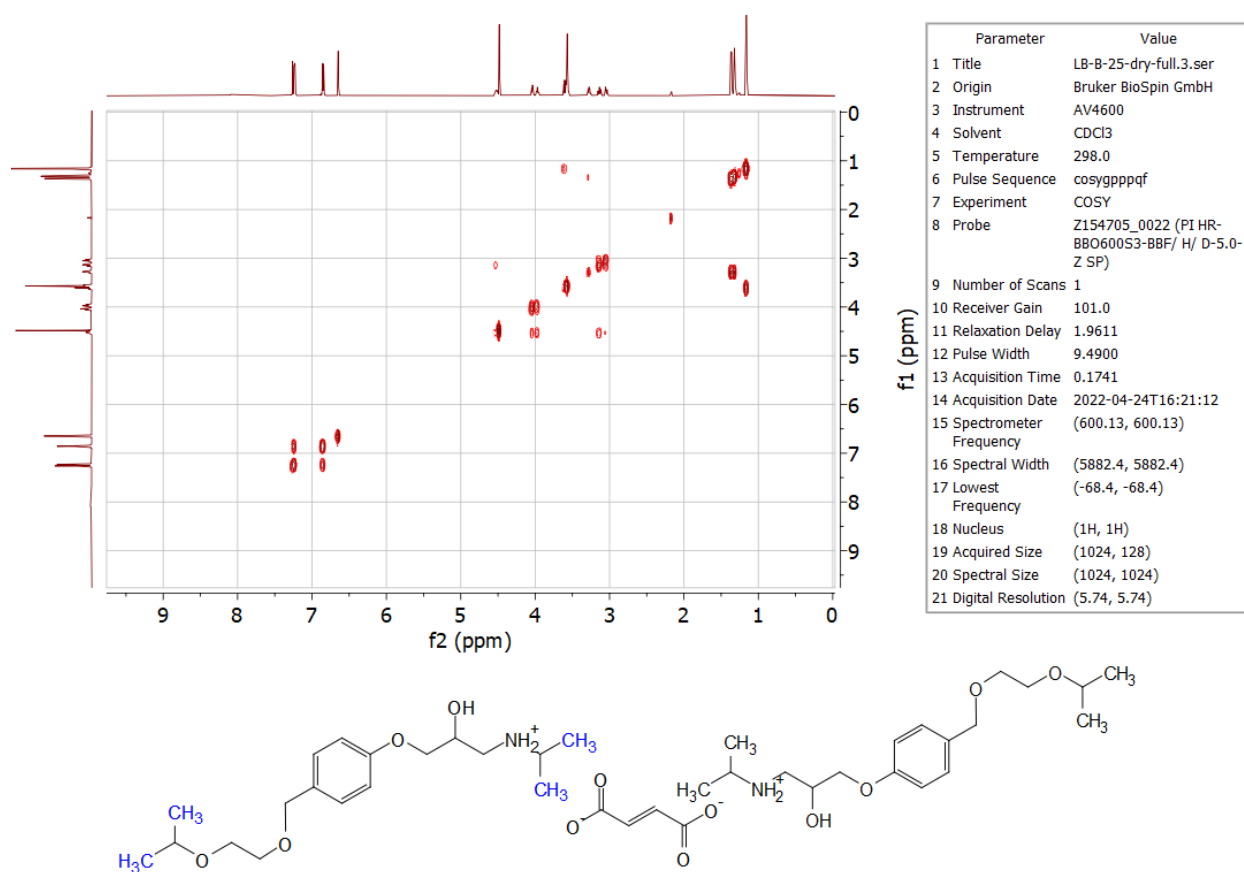

**Figure S23.** H,H-COSY-NMR spectrum (600 MHz, CDCl<sub>3</sub>) of bisoprolol hemifumarate (**7**).

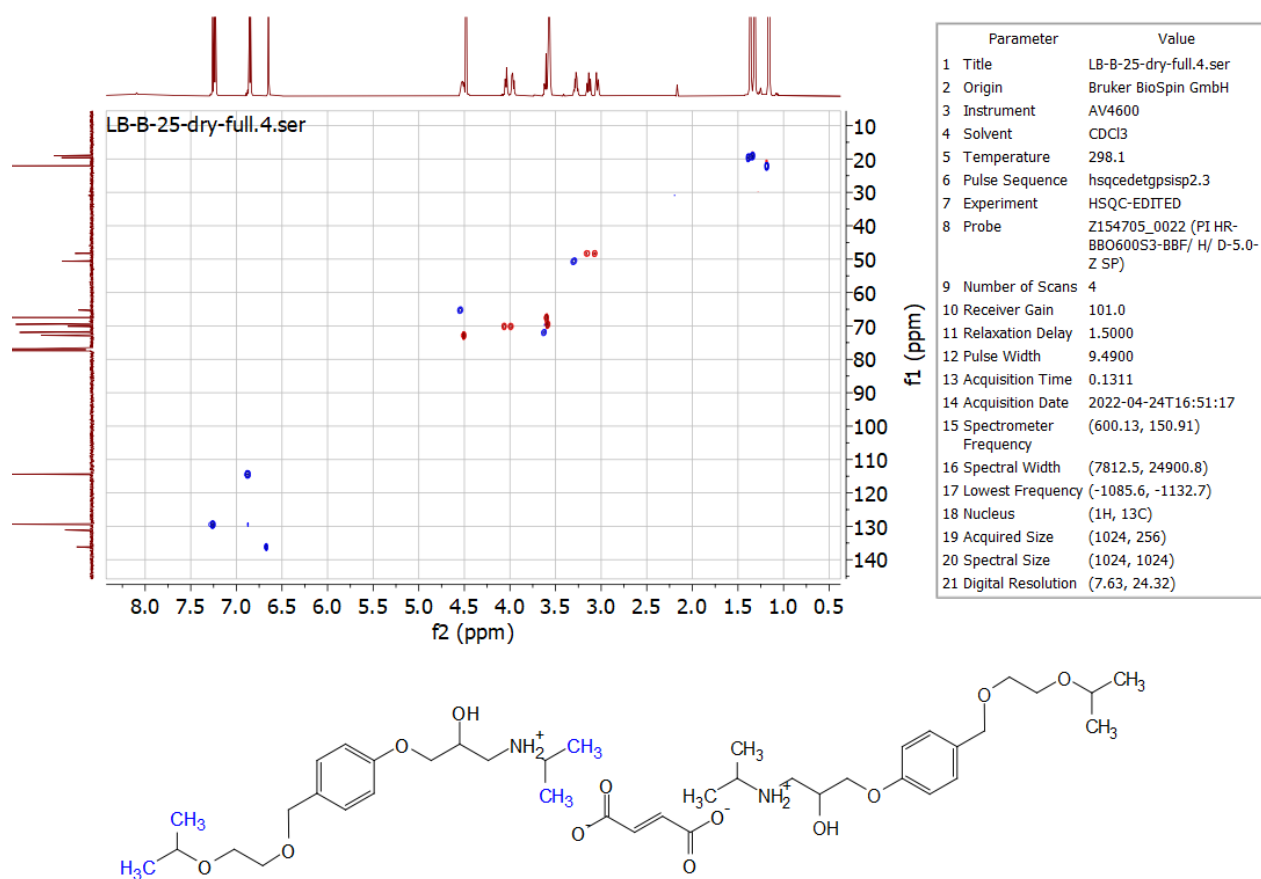

**Figure S24.** HSQC-NMR spectrum (600 MHz, CDCl<sub>3</sub>) of bisoprolol hemifumarate (7).



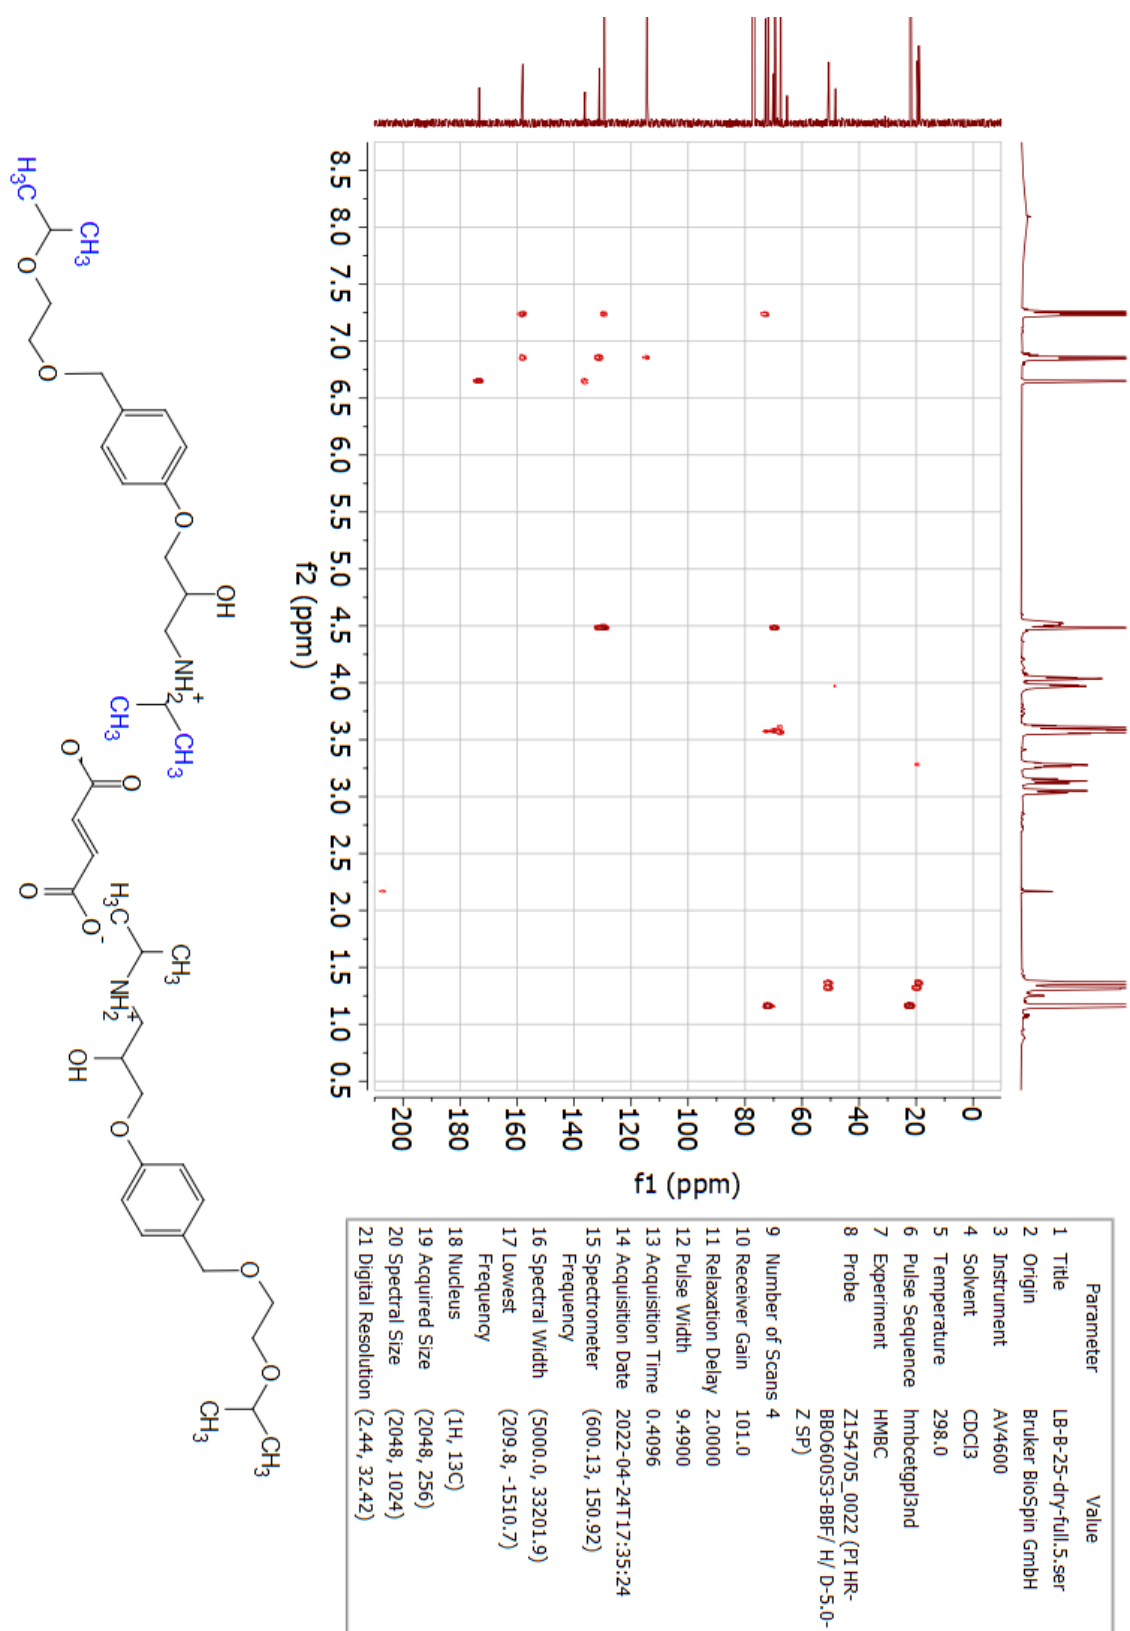

**Figure S25.** HMBC-NMR spectrum (600 MHz, CDCl<sub>3</sub>) of bisoprolol hemifumarate (7).

## 2. HPLC chromatograms.

### Separation of enantiomers of **4**, **5** and **7** on Chiralcel OD-H column

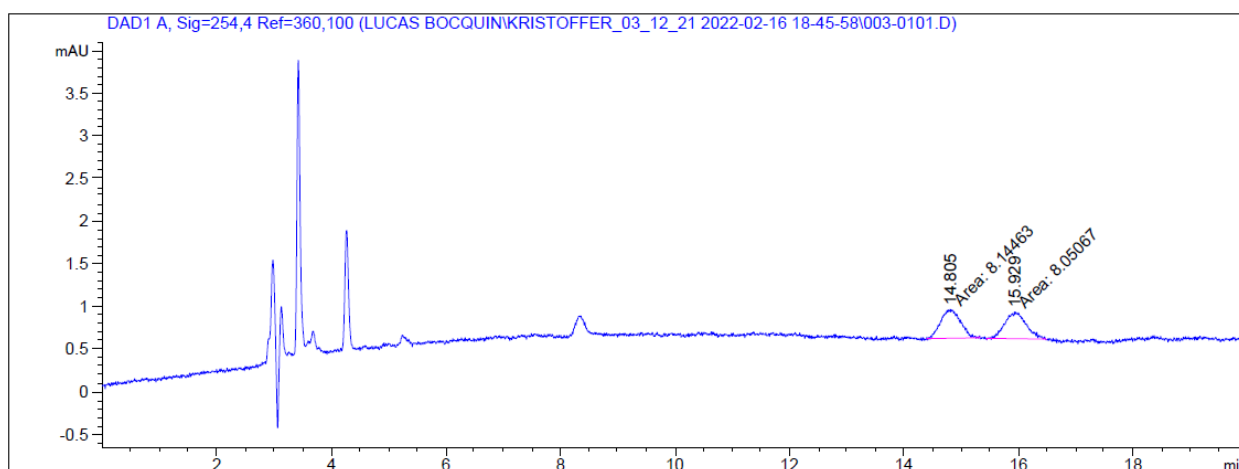

**Figure S26.** Chiral HPLC chromatogram of chlorohydrin **4**. The analysis was performed on a Chiralcel OD-H column with hexane and 2-propanol (90:10) as eluent and 1 mL/min flow, and with a detection wavelength of 280.8 nm. The retention times are  $t_R((R)\text{-}\mathbf{4}) = 14.81$  min and  $t_R((S)\text{-}\mathbf{4}) = 15.93$  min.  $R_S((S)/(R)\text{-}\mathbf{4}) = 1.63$ . The column impurities do not affect the separation of the enantiomers.

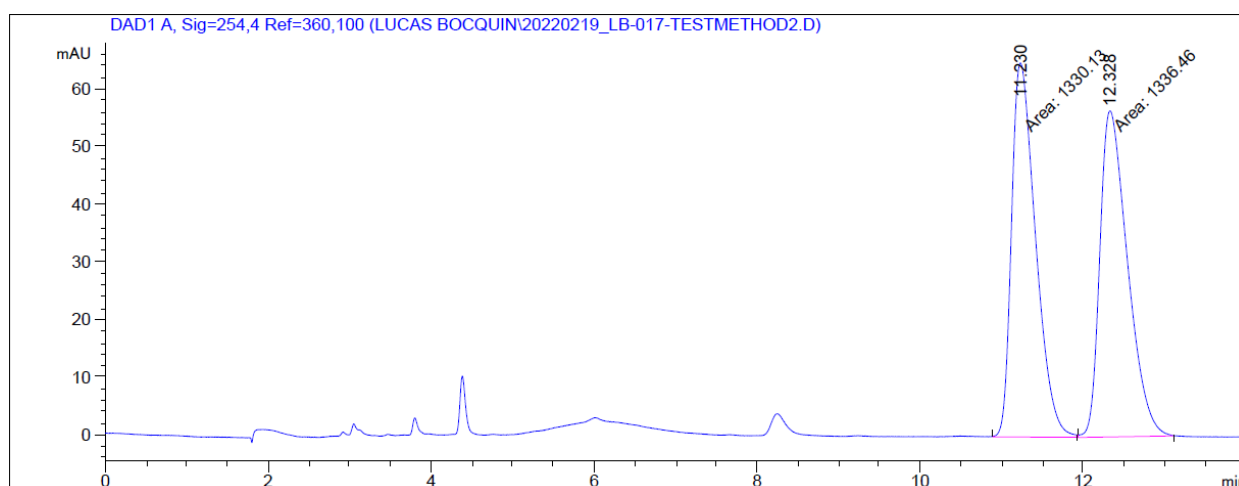

**Figure S27.** Chiral HPLC chromatogram of ester **5**. The analysis was performed on a Chiralcel OD-H column with hexane and 2-propanol (96:4) as eluent and 1 mL/min flow, and with a detection wavelength of 280.8 nm. The retention times obtained are  $t_R((R)\text{-}\mathbf{5}) = 11.23$  min

and  $t_R((S)-5) = 12.33$  min.  $R_S((S)/(R)-5) = 1.89$ . The column impurities do not affect the separation of the enantiomers.

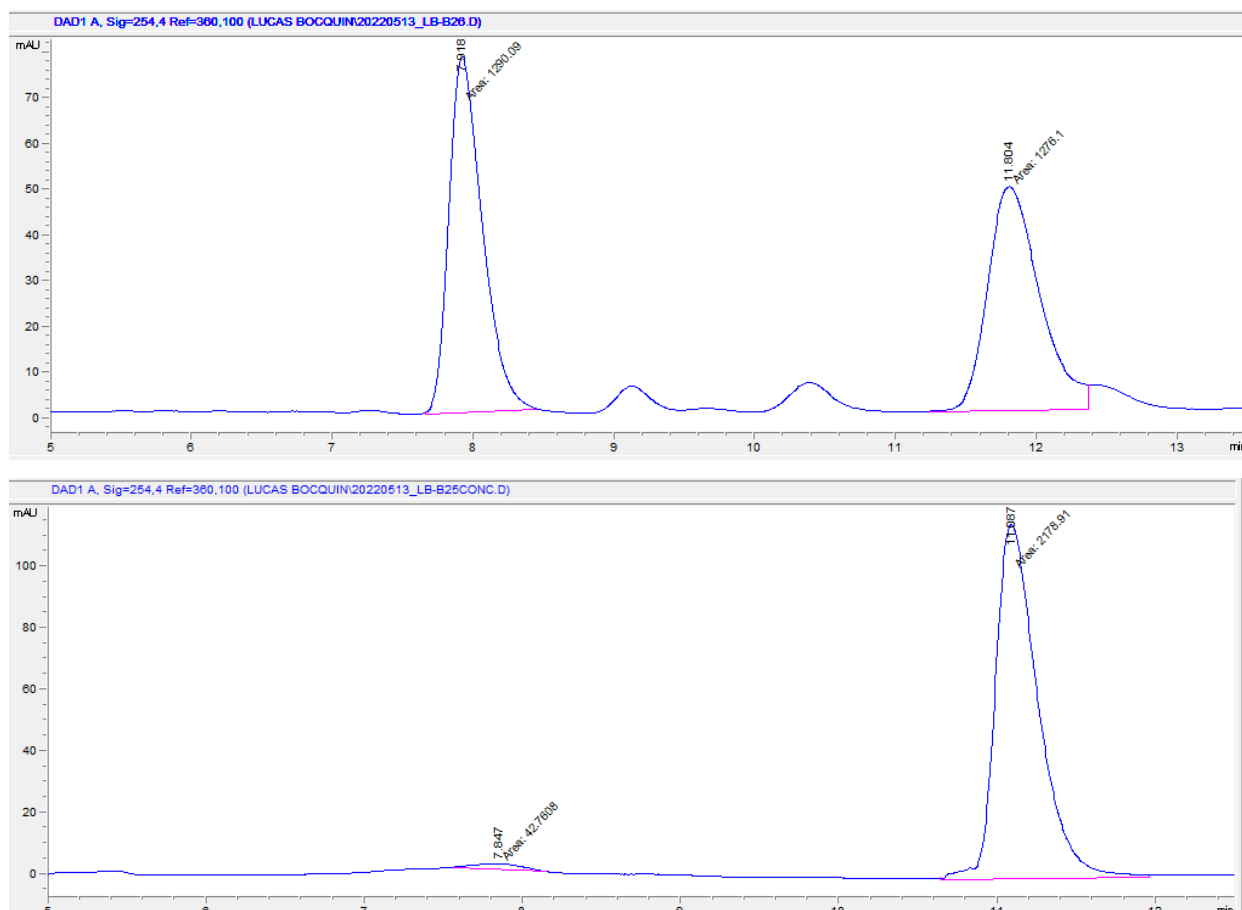

**Figure S28.** Chiral HPLC chromatogram of racemic bisoprolol hemifumarate (**7**) (upper chromatogram) and enantiopure (*S*)-**7** (*ee* =96%) (bottom chromatogram). The analysis was performed on a Chiralcel OD-H column with hexane (90%) and 2-propanol containing 2% diethanolamine (10%) as eluent and 1 mL/min flow, and with a detection wavelength of 254.4 nm. The retention times are  $t_R((R)-7) = 7.84$  min and  $t_R((S)-7) = 11.08$  min (lower chromatogram). The resolution factor in the upper chromatogram is  $R_S((S)/(R)-7) = 7.02$ .
